# Supplementary material for: Anti-Obesity Effects of the Larval Powder of Steamed and Lyophilized Mature Silkworms in a Newly Designed Adult Mouse Model
Source: MDPI journal article supplement (doi:10.3390/foods12193613), 2023-09-28
Supplement: s1 [file s1]

**Table S1.** List of abbreviations (in alphabetical order).

|       |                                                |
|-------|------------------------------------------------|
| ALP   | alkaline phosphatase                           |
| ALT   | alanine transaminase                           |
| ANOVA | one-way analysis of variance                   |
| AST   | asparagine transaminase                        |
| BUN   | blood urea nitrogen                            |
| BW    | body weight                                    |
| BWG   | body weight gain                               |
| FER   | food efficiency ratio                          |
| FI    | food intake                                    |
| HDLC  | high-density lipoprotein cholesterol           |
| HFD   | high-fat diet                                  |
| IAT   | intra-abdominal adipose tissue                 |
| LDLC  | low-density lipoprotein cholesterol            |
| MC    | methylcellulose                                |
| MS    | mature silkworm                                |
| ND    | normal diet                                    |
| SEM   | standard error of the mean                     |
| SMSP  | steamed and lyophilized mature silkworm powder |
| SP    | silk peptide                                   |
| TC    | total cholesterol                              |
| TFI   | total food intake                              |
| TG    | triglyceride                                   |
